# Supplementary material for: Neuroprotective Action of Tacrolimus before and after Onset of Neonatal Hypoxic–Ischaemic Brain Injury in Rats
Source: MDPI journal article supplement (doi:10.3390/cells12222659), 2023-11-20
Supplement: s1 [file s1]

# Supplementary File S1:

**Table S1.** Experimental groups to assess the immunosuppressive effect of tacrolimus administered for three days until post mortem on PND 11.

| Experimental group         | Number of pups | Pup sex (M/F) |
|----------------------------|----------------|---------------|
| PBS                        | 14             | 7/7           |
| 0.025 mg/kg/day tacrolimus | 10             | 4/6           |
| 0.05 mg/kg/day tacrolimus  | 9              | 4/5           |
| 0.25 mg/kg/day tacrolimus  | 8              | 4/4           |
| 0.5 mg/kg/day tacrolimus   | 4              | 2/2           |
| 1.0 mg/kg/day tacrolimus   | 5              | 3/2           |

**Table S2.** Experimental groups to assess the long-term safety of tacrolimus administered daily from PND 7 to PND 50.

| Experimental group         | Number of pups | Pup sex (M/F) |
|----------------------------|----------------|---------------|
| PBS                        | 16             | 8/8           |
| 0.025 mg/kg/day tacrolimus | 8              | 4/4           |
| 0.05 mg/kg/day tacrolimus  | 9              | 5/4           |
| 0.1 mg/kg/day tacrolimus   | 7              | 3/4           |
| 0.25 mg/kg/day tacrolimus  | 6              | 3/3           |
| 0.5 mg/kg/day tacrolimus   | 6              | 3/3           |
| 1.0 mg/kg/day tacrolimus   | 7              | 4/3           |

**Table S3.** Experimental groups to assess the neuroprotective action of tacrolimus.

| Experimental group              | Number of pups (M/F)                                     |                                                            |
|---------------------------------|----------------------------------------------------------|------------------------------------------------------------|
|                                 | <i>Pre-HI tacrolimus or PBS started 3 days before HI</i> | <i>Post-HI tacrolimus or PBS started 12 hours after HI</i> |
| Sham + PBS                      | 11 (6/5)                                                 |                                                            |
| HI + PBS                        | 10 (6/4)                                                 |                                                            |
| HI + 0.025 mg/kg/day tacrolimus | 8 (4/4)                                                  | 8 (4/4)                                                    |
| HI + 0.05 mg/kg/day tacrolimus  | 8 (4/4)                                                  | 8 (4/4)                                                    |
| HI + 0.1 mg/kg/day tacrolimus   | 7 (5/2)                                                  | 8 (4/4)                                                    |
| HI + 0.25 mg/kg/day tacrolimus  | 8 (3/6)                                                  | 9 (5/4)                                                    |
|                                 |                                                          | 7 (3/4)                                                    |
|                                 |                                                          | 6 (3/3)                                                    |

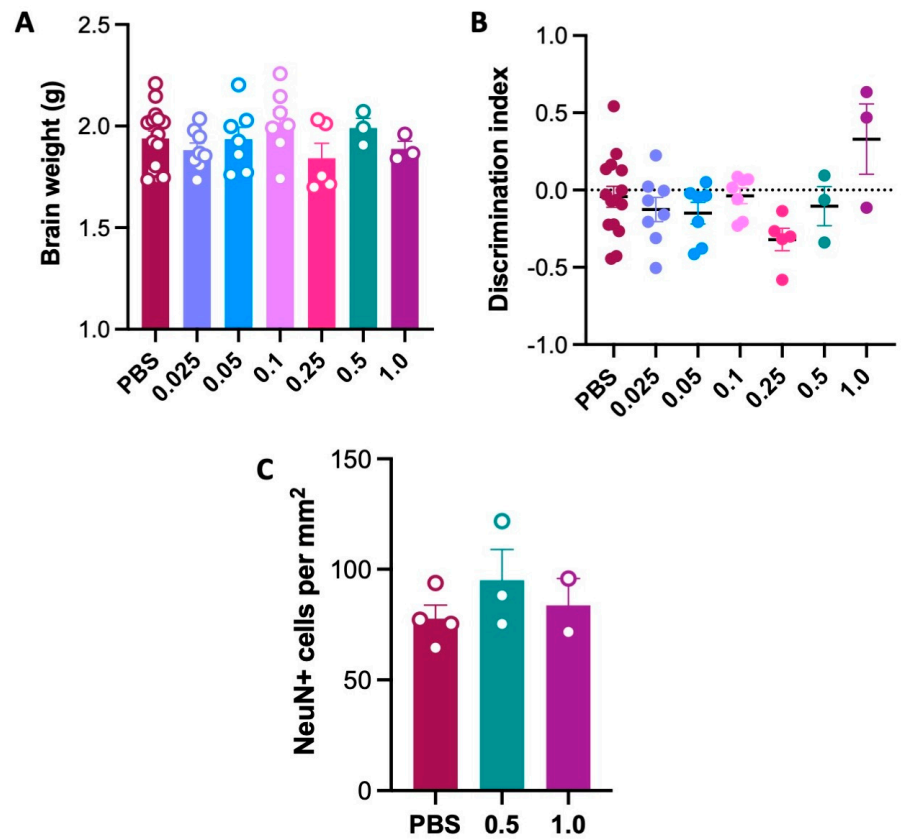

**Figure S1.** Tacrolimus has no long-term detrimental effect on the brain or cognitive function. (A) Brain weight at PND50 following long term daily treatment with tacrolimus,  $n = 3-16$  (B) Novel object recognition test performed at PND50 shows no cognitive deficits in animals that received daily tacrolimus,  $n = 3-15$ . (C) Neuron cell count in the CA3 region of the hippocampus was not reduced with higher doses of tacrolimus when a small subset of animals were compared to PBS controls,  $n = 2-4$ .
